# Supplementary figures and images for: Peripheral Inflammation, Apolipoprotein E4, and Amyloid-β Interact to Induce Cognitive and Cerebrovascular Dysfunction
Source: PubMed Central journal article supplement — ASN Neuro. 2017 Jul 14;9(4):1759091417719201. doi: 10.1177/1759091417719201 (PMC5521356; doi:10.1177/1759091417719201), 2017-07-14

Supplementary Figure 1

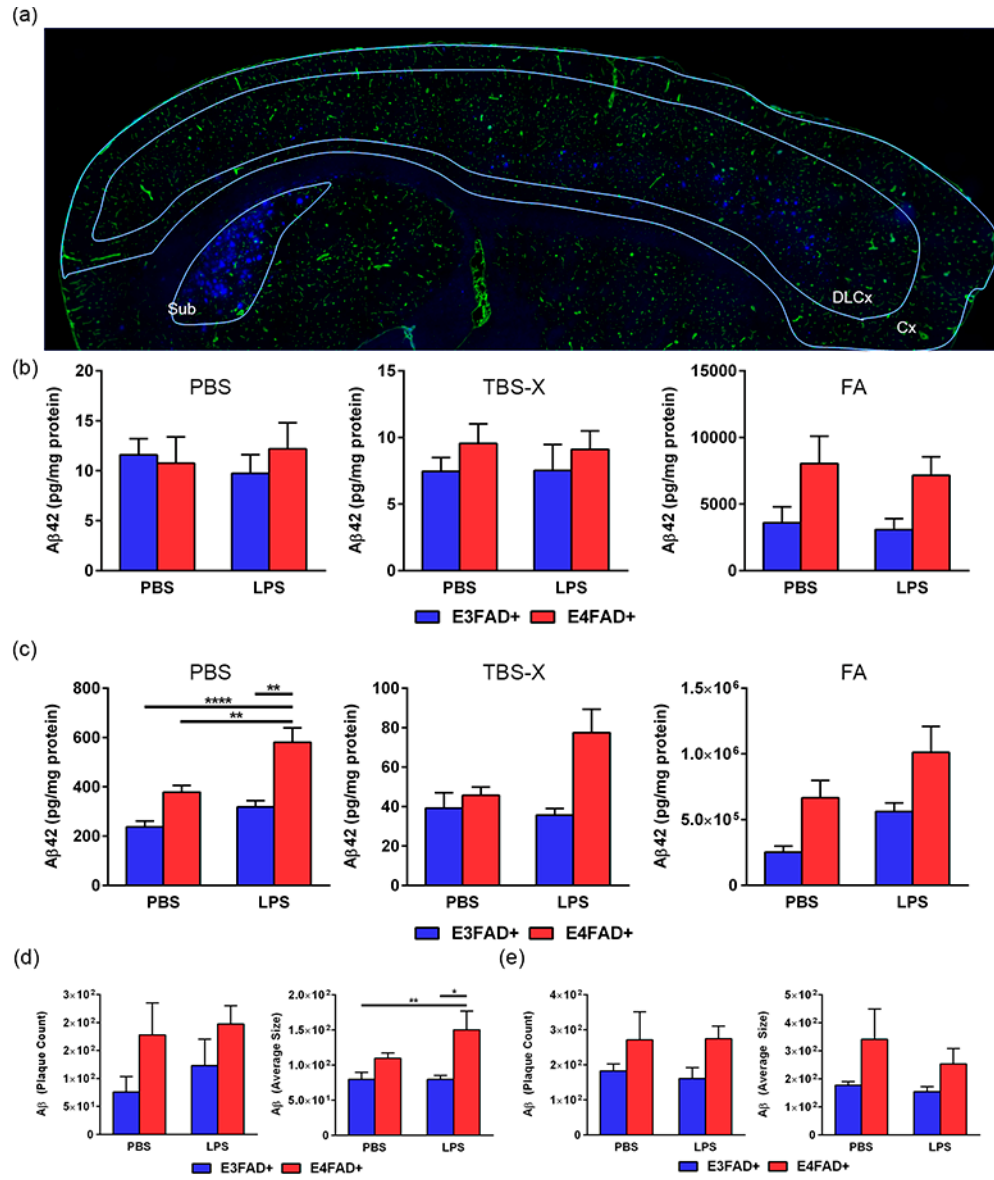

Supplement: ASN719201_supplementary_figure.pdf [file ASN719201_supplementary_figure.pdf]
